# Supplementary material
Source: publisher site journal article supplement (https://zookeys.pensoft.net/article/63431/download/suppl/32/)
Supplement: Supplementary file

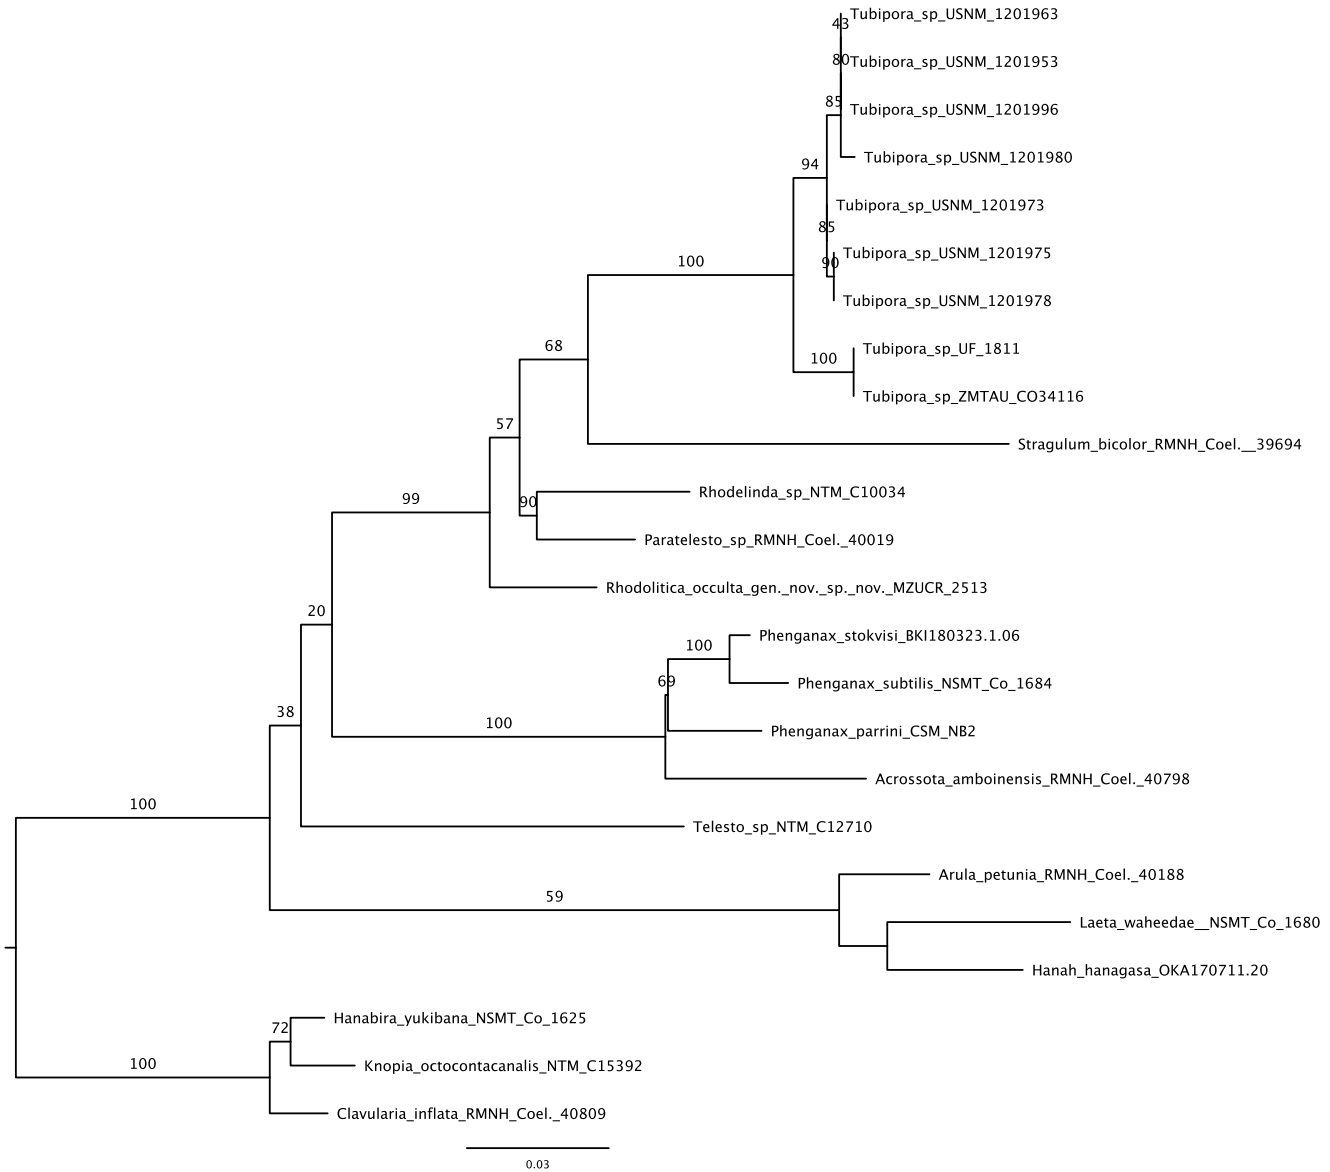

Supplemental Figure S1: Maximum likelihood tree for *mtMutS* (738 nt). Only the stoloniferan clade that includes *Rhodolitica occulta* gen. nov. sp. nov. is shown, rooted to *Clavularia inflata*. Numbers on branches are bootstrap values (% of 100 replicates).
